# Supplementary material for: Predicting the Composition and Mechanical Properties of Seaweed Bioplastics from the Scientific Literature: A Machine Learning Approach for Modeling Sparse Data
Source: MDPI journal article supplement (doi:10.3390/app132111841), 2023-10-30
Supplement: s1 [file s1]

## Supplementary Materials

# Predicting the composition and mechanical properties of seaweed bioplastics from the scientific literature: A machine learning approach for modeling sparse data

Davor Ibarra-Pérez<sup>1,\*</sup>, Simón Faba<sup>4</sup>, Valentina Hernandez-Muñoz<sup>2</sup>, Charlene Smith<sup>3</sup>, María José Galotto<sup>4</sup>, Alysia Garmulewicz<sup>5,\*</sup>

<sup>1</sup> Department of Mechanical Engineering, University of Santiago of Chile (USACH), Avenida Libertador Bernardo O'Higgins 3363, Santiago 9170022, Chile

<sup>2</sup> Department of Industrial Engineering, University of Santiago of Chile (USACH), Avenida Libertador Bernardo O'Higgins 3363, Santiago 9170022, Chile

<sup>3</sup> Materiom C.I.C, E8 4QS London, UK

<sup>4</sup> Packaging Innovation Center (LABEN-CHILE), Department of Food Science and Technology, Faculty of Technology, Center for the Development of Nanoscience and Nanotechnology (CEDENNA), University of Santiago de Chile (USACH), Santiago 9170201, Chile

<sup>5</sup> Faculty of Economics and Management, Department of Management, University of Santiago of Chile (USACH), Avenida Libertador Bernardo O'Higgins 3363, Santiago 9170022, Chile

\* Correspondence: davor.ibarra@usach.cl; alysia.garmulewicz@usach.cl

## Supplementary Materials

Once the criteria for each section are validated, the information is extracted in tabular form, documenting in linear form each of the formulations and results obtained, with their respective units and identification fields. These are summarized in the following structure in Table S1 (It should be noted that all the columns of units respective to each property were suppressed to focus only on the properties obtained):

**Table S1.** Structure of data extraction in table form.

| Category    | Name Column     |
|-------------|-----------------|
| Material ID | Paper DOI       |
|             | Unique ID       |
|             | Material System |
|             | Abbreviations   |
| Ingredients | Ingredient 1    |
|             | Abbreviations 1 |

|            |                           |
|------------|---------------------------|
|            | Concentration 1           |
|            | Units 1                   |
|            | Portion 1                 |
|            | Ingredient 2              |
|            | Abbreviations 2           |
|            | Concentration 2           |
|            | Units 2                   |
|            | Portion 2                 |
|            | Ingredient 3              |
|            | Abbreviations 3           |
|            | Concentration 3           |
|            | Units 3                   |
|            | Portion 3                 |
|            | Ingredient 4              |
|            | Abbreviations 4           |
|            | Concentration 4           |
|            | Units 4                   |
|            | Portion 4                 |
|            | Ingredient 5              |
|            | Abbreviations 5           |
|            | Concentration 5           |
|            | Units 5                   |
|            | Portion 5                 |
| Method     | Process                   |
|            | Tools                     |
|            | Tensile strength          |
| Mechanical | Tensile strength units    |
| Properties | Elongation at break       |
|            | Elongation at break units |

Table S2 represents Pearson correlation with mechanical properties by raw data, should be possible to observe which components promote the respective property according to the subset of the extracted data, but how sparse data the metrics is not useful for indicating the relationship of the components.

**Table S2.** Pearson correlation for raw data with respect to mechanical properties.

| Component                      | Pearson correlation<br>(Tensile strength) | Pearson correlation<br>(Elongation at break) |
|--------------------------------|-------------------------------------------|----------------------------------------------|
| Agar                           | 0.519395                                  | -0.169453                                    |
| CarboxyMethylCellulose         | 0.383892                                  | -0.238918                                    |
| Starch                         | 0.324773                                  | -0.171730                                    |
| BarbatimaoMicrocapsulesCDX     | 0.267977                                  | -0.085823                                    |
| Anthocyanin                    | 0.267479                                  | -0.083598                                    |
| Shikonin                       | 0.266662                                  | -0.080227                                    |
| LyophilizedExtractOfBarbatimao | 0.260380                                  | -0.086128                                    |

|                                   |           |           |
|-----------------------------------|-----------|-----------|
| CelluloseNanocrystals             | 0.254150  | -0.097281 |
| BarbatimaoMicrocapsulesCD         | 0.244071  | -0.085570 |
| CitricAcid                        | 0.167684  | -0.169457 |
| GumGhatti                         | 0.154652  | -0.152933 |
| PolyethyleneGlycol                | 0.058711  | -0.154382 |
| MicrocapsulesCD                   | 0.045270  | -0.083846 |
| MicrocapsulesCDX                  | 0.005680  | -0.079106 |
| XanthanGum                        | -0.001796 | -0.093062 |
| ElephantFootYamStarch             | -0.015602 | -0.148226 |
| Gelatin                           | -0.050781 | 0.074423  |
| Jaboticaba peel                   | -0.060230 | -0.019665 |
| SoybeanOil                        | -0.062953 | -0.035249 |
| SunflowerOil                      | -0.068445 | 0.043610  |
| CornOil                           | -0.069902 | 0.153843  |
| GrapheneOxide                     | -0.080650 | 0.154502  |
| GoldNanoparticles                 | -0.080919 | -0.003113 |
| OrganicPowderedCottonii           | -0.089731 | -0.268127 |
| OliveOil                          | -0.093707 | 0.014411  |
| Carrageenan                       | -0.096762 | -0.118346 |
| EO of Cinnamon                    | -0.105533 | -0.048842 |
| Alginate                          | -0.106741 | 0.163774  |
| Sorbitol                          | -0.108914 | -0.170174 |
| Glyoxal                           | -0.116147 | 0.109537  |
| Glutaraldehyde                    | -0.117258 | 0.230607  |
| RiceStarch                        | -0.121901 | 0.316595  |
| Glycerol                          | -0.140844 | 0.246273  |
| SugarPalmNanocrystallineCellulose | -0.148843 | 0.065018  |
| SugarPalmStarch                   | -0.148843 | 0.065018  |
| Tween 80                          | -0.152621 | 0.121144  |

|                                  |           |          |
|----------------------------------|-----------|----------|
| PolyvinylAlcohol                 | -0.162440 | 0.289430 |
| EO of ArtemisiaHerbaAlbaAsso     | -0.168590 | 0.046681 |
| HydroxypropylCassavaStarchPowder | -0.169056 | 0.441111 |
| VirginCoconutOil                 | -0.181268 | 0.086167 |
| DOI_ID                           | -0.276187 | 0.030692 |
| CalciumChloride                  | -0.286061 | 0.284818 |

Figure S1 shows the number of values for each of the components (A) with the standard deviation (B). It is observed that there is a high variation between the amount of one component and another, as well as the variation of the component values. This is relevant because it implies that there are characteristics that offer more information than others for the model.

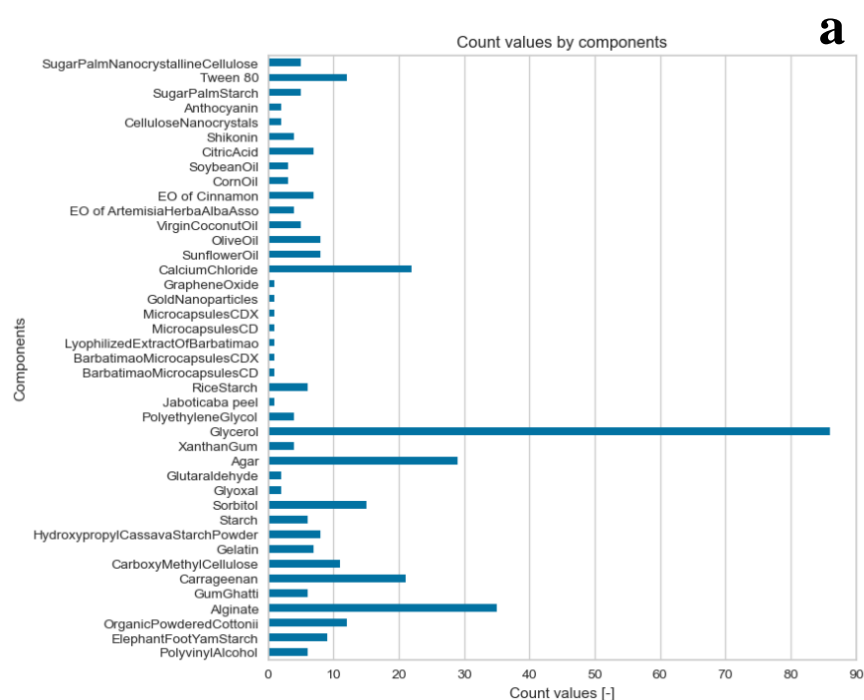

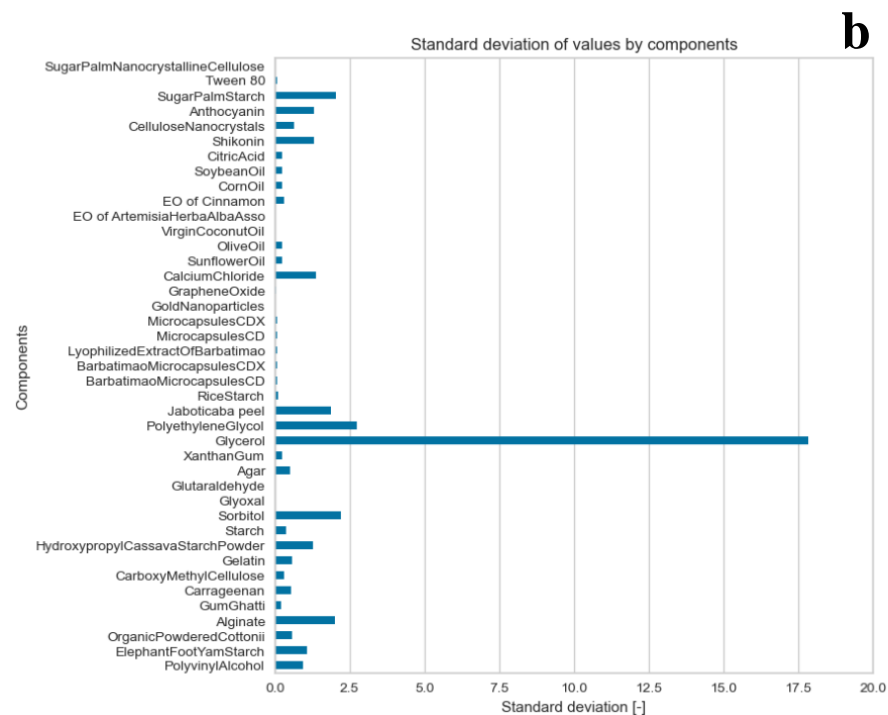

**Figure S1.** Features count values (A) and standard deviation (B) of each component.

Figure S2 show the jambu elbow plot, this indicates the variation of the inertia of the clustered sets as the number of clusters is varied.

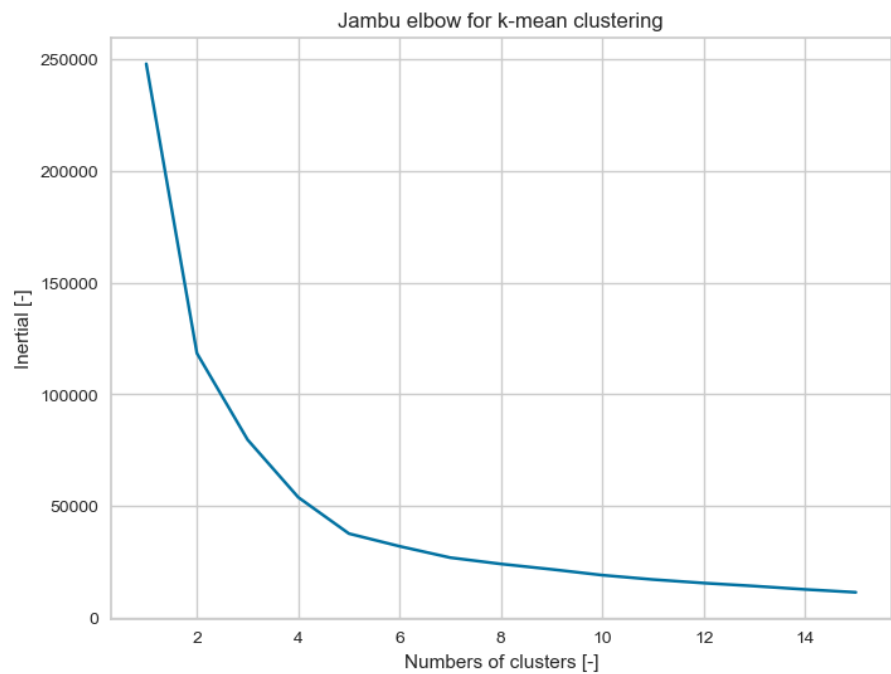

**Figure S2.** Jambu elbow for k-mean clustering

Table S3, S4, S5, S6 represent Pearson correlation by each cluster and mechanical properties considerate, it is possible to observe which components promote the respective property according to the subset of the extracted data.

**Table S3.** Pearson correlation for cluster a containing formulations with high elongation at break capacity and low tensile strength.

| Component                         | Pearson correlation<br>(Tensile strength) | Pearson correlation<br>(Elongation at break) |
|-----------------------------------|-------------------------------------------|----------------------------------------------|
| RiceStarch                        | 0.555631                                  | -0.096436                                    |
| Agar                              | 0.547528                                  | -0.134639                                    |
| HydroxypropylCassavaStarchPowder  | 0.547528                                  | -0.134639                                    |
| Glycerol                          | 0.507423                                  | -0.018233                                    |
| Gelatin                           | 0.361734                                  | -0.021574                                    |
| Tween 80                          | 0.289891                                  | 0.058294                                     |
| CornOil                           | 0.289891                                  | 0.058294                                     |
| Carrageenan                       | 0.289891                                  | 0.058294                                     |
| SugarPalmStarch                   | 0.075039                                  | 0.744508                                     |
| EO of Cinnamon                    | 0.075039                                  | 0.744508                                     |
| Sorbitol                          | 0.075039                                  | 0.744508                                     |
| SugarPalmNanocrystallineCellulose | 0.075039                                  | 0.744508                                     |
| GrapheneOxide                     | -0.187558                                 | -0.069068                                    |
| Glyoxal                           | -0.222571                                 | -0.057000                                    |
| Glutaraldehyde                    | -0.321208                                 | -0.051827                                    |
| Alginate                          | -0.330436                                 | -0.319252                                    |
| SunflowerOil                      | -0.346307                                 | 0.078626                                     |
| OliveOil                          | -0.347420                                 | -0.388179                                    |
| PolyvinylAlcohol                  | -0.507423                                 | 0.018233                                     |
| CalciumChloride                   | -0.537359                                 | -0.239779                                    |

**Table S4.** Pearson correlation cluster b containing formulations with low elongation at break capacity and medium tensile strength.

| Component       | Pearson correlation<br>(Tensile strength) | Pearson correlation<br>(Elongation at break) |
|-----------------|-------------------------------------------|----------------------------------------------|
| CitricAcid      | 0.721592                                  | 0.013091                                     |
| CalciumChloride | 0.721592                                  | 0.013091                                     |
| Alginate        | 0.719959                                  | 0.015169                                     |
| GumGhatti       | 0.660508                                  | 0.040407                                     |
| MicrocapsulesCD | 0.195797                                  | -0.178259                                    |

|                                   |           |           |
|-----------------------------------|-----------|-----------|
| Glycerol                          | 0.176437  | 0.112316  |
| XanthanGum                        | 0.060150  | 0.268787  |
| MicrocapsulesCDX                  | 0.053681  | -0.137951 |
| ElephantFootYamStarch             | 0.050361  | 0.426807  |
| Gelatin                           | 0.040073  | -0.141593 |
| Carrageenan                       | 0.022489  | 0.055953  |
| Agar                              | -0.010992 | -0.143049 |
| CarboxyMethylCellulose            | -0.044388 | -0.427716 |
| SoybeanOil                        | -0.123781 | 0.256677  |
| Tween 80                          | -0.123781 | 0.256677  |
| EO of Cinnamon                    | -0.222601 | 0.008947  |
| PolyethyleneGlycol                | -0.278631 | -0.250930 |
| Sorbitol                          | -0.340857 | -0.226521 |
| SugarPalmNanocrystallineCellulose | -0.415389 | 0.212925  |
| SugarPalmStarch                   | -0.415389 | 0.212925  |
| OrganicPowderedCottonii           | -0.515192 | -0.391069 |

**Table S5.** Pearson correlation for cluster c containing formulations with low elongation at break capacity and high tensile strength.

| Component                      | Pearson correlation<br>(Tensile strength) | Pearson correlation<br>(Elongation at break) |
|--------------------------------|-------------------------------------------|----------------------------------------------|
| Alginate                       | 0.701726                                  | -0.628384                                    |
| BarbatimaoMicrocapsulesCDX     | 0.436752                                  | -0.341703                                    |
| LyophilizedExtractOfBarbatimao | 0.397124                                  | -0.347939                                    |
| BarbatimaoMicrocapsulesCD      | 0.312038                                  | -0.336505                                    |
| PolyethyleneGlycol             | 0.187790                                  | -0.251271                                    |
| OrganicPowderedCottonii        | 0.187790                                  | -0.251271                                    |
| Anthocyanin                    | 0.027371                                  | 0.439068                                     |
| CelluloseNanocrystals          | -0.040511                                 | 0.020062                                     |
| Shikonin                       | -0.138876                                 | 0.414499                                     |
| Glycerol                       | -0.187790                                 | 0.251271                                     |
| CarboxyMethylCellulose         | -0.302092                                 | 0.747987                                     |

|        |           |           |
|--------|-----------|-----------|
| Starch | -0.308184 | -0.174259 |
| Agar   | -0.730500 | 0.699671  |

**Table S6.** Pearson correlation for cluster d containing formulations with medium elongation at break capacity and low tensile strength.

| Component                        | Pearson correlation<br>(Tensile strength) | Pearson correlation<br>(Elongation at break) |
|----------------------------------|-------------------------------------------|----------------------------------------------|
| PolyvinylAlcohol                 | 0.537084                                  | -0.039951                                    |
| Tween 80                         | 0.293103                                  | -0.152541                                    |
| Carrageenan                      | 0.283033                                  | -0.280829                                    |
| CornOil                          | 0.182947                                  | 0.125143                                     |
| HydroxypropylCassavaStarchPowder | 0.090140                                  | 0.398835                                     |
| Agar                             | 0.090140                                  | 0.398835                                     |
| RiceStarch                       | 0.090140                                  | 0.398835                                     |
| SoybeanOil                       | 0.086147                                  | -0.033031                                    |
| SunflowerOil                     | 0.039553                                  | -0.185899                                    |
| Jaboticaba peel                  | -0.007902                                 | -0.337326                                    |
| OliveOil                         | -0.070261                                 | -0.062286                                    |
| Glyoxal                          | -0.110603                                 | -0.219330                                    |
| GoldNanoparticles                | -0.110603                                 | -0.219330                                    |
| VirginCoconutOil                 | -0.253321                                 | 0.176719                                     |
| EO of ArtemisiaHerbaAlbaAsso     | -0.259046                                 | -0.070086                                    |
| Alginate                         | -0.267281                                 | 0.204694                                     |
| CalciumChloride                  | -0.391001                                 | 0.149942                                     |
| Glycerol                         | -0.537084                                 | 0.039951                                     |
